# Supplementary material for: Highly efficient and ultra-stable CsPbBr3 composites for LCD devices and X-ray imaging
Source: Royal Society of Chemistry journal article supplement (doi:10.1039/d3tc04701f), 2024-01-01
Supplement: d3tc04701f1.pdf [file d3tc04701f1.pdf]

## Electronic supplementary information

### Highly Efficient and Ultra-Stable CsPbBr<sub>3</sub> Composites for LCD

#### Device and X-ray Imaging

Peng Wang, ‡<sup>abc</sup> Zhaoyu Wang, ‡<sup>d</sup> Meiyi Zhu, ‡<sup>abc</sup> QiuTing Cai, <sup>abc</sup> Hanyan Huang, <sup>abc</sup> Chengyuan Tang, <sup>abc</sup> Haoran Zhang, <sup>abc</sup> Chao Fan, <sup>\*abce</sup> Xingliang Dai, <sup>abce</sup> Haiping He<sup>\*abce</sup> and Zhizhen Ye<sup>\*abce</sup>

<sup>a</sup> School of Materials Science and Engineering, State Key Laboratory of Silicon and Advanced Semiconductor Materials, Zhejiang University, Hangzhou 310027, P. R. China.

<sup>b</sup> Wenzhou Key Laboratory of Novel Optoelectronic and Nano Materials, Zhejiang Provincial Engineering Research Center of Oxide Semiconductors for Environmental and Optoelectronic Applications, Institute of Wenzhou, Zhejiang University, Wenzhou 325006, P. R. China.

<sup>c</sup> Wenzhou XINXINTAIJING Tech. Co. Ltd., Wenzhou, 325006, P. R. China.

<sup>d</sup> State Key Laboratory of Structural Chemistry, Fujian Institute of Research on the Structure of Matter, Chinese Academy of Sciences Fuzhou, Fujian 350002 P. R. China.

<sup>e</sup> Shanxi-Zheda Institute of Advanced Materials and Chemical Engineering, Shanxi, 030000 P. R. China.

\*Corresponding Author: [chaofan@hnu.edu.cn](mailto:chaofan@hnu.edu.cn); [hphe@zju.edu.cn](mailto:hphe@zju.edu.cn); [yezz@zju.edu.cn](mailto:yezz@zju.edu.cn)

‡ These authors contributed equally to this work.

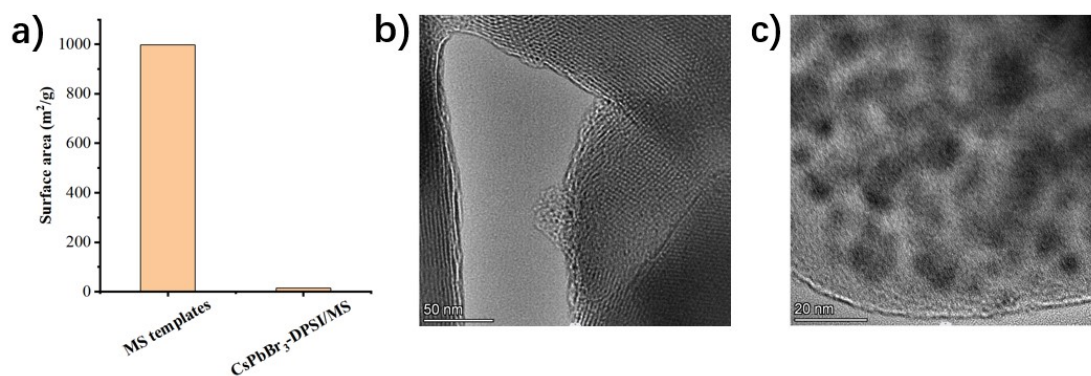

**Fig. S1** a) BET result of MS templates and  $\text{CsPbBr}_3\text{-DPSI/MS}$  composites. b) TEM image of the original MS templates, showing the mesoporous structure. c) TEM image of  $\text{CsPbBr}_3\text{-DPSI/MS}$  composites.

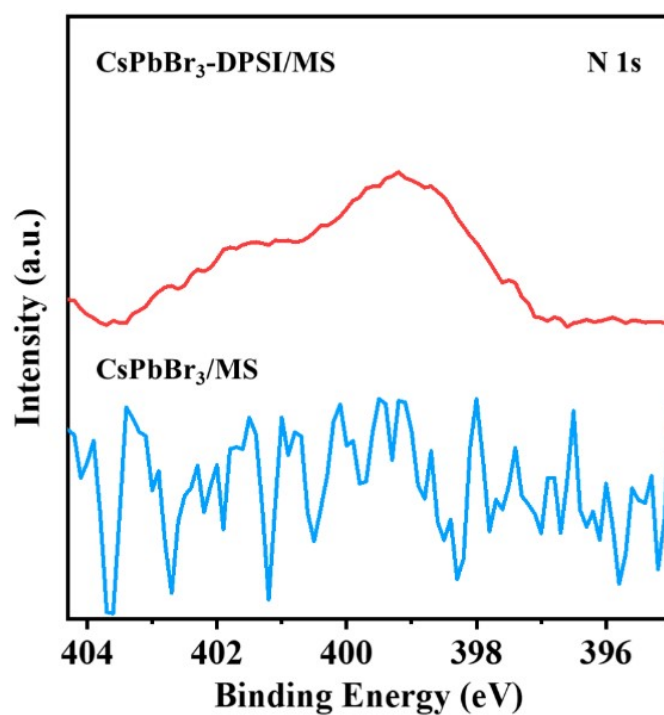

**Fig. S2** The  $\text{N } 1s$  XPS spectra of  $\text{CsPbBr}_3\text{/MS}$  and  $\text{CsPbBr}_3\text{-DPSI/MS}$ .

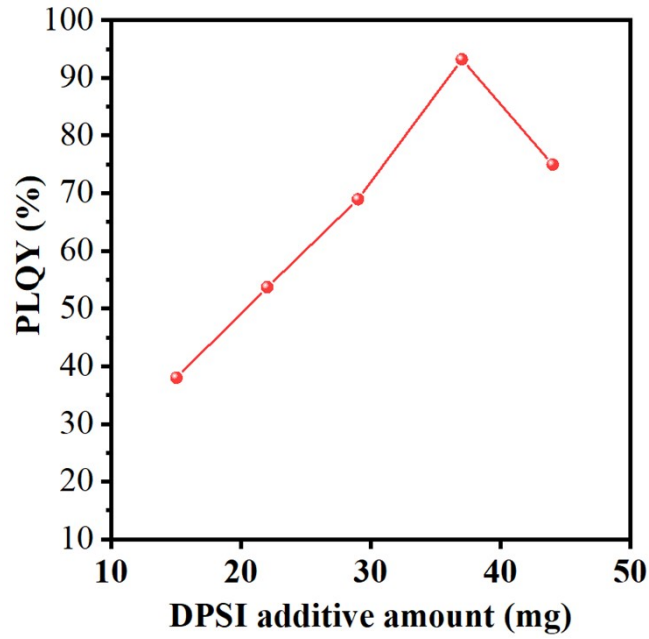

**Fig.S3** The PLQY of obtained samples as a function of the DPSI additive amount in precursors

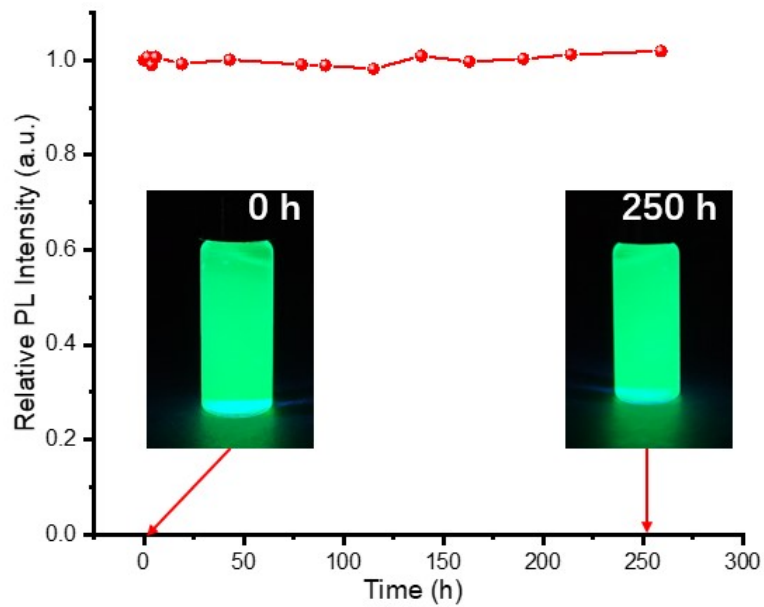

**Fig. S4** Relative PL intensity curve of CsPbBr<sub>3</sub>-DPSI/MS composites in water for 250 hours.

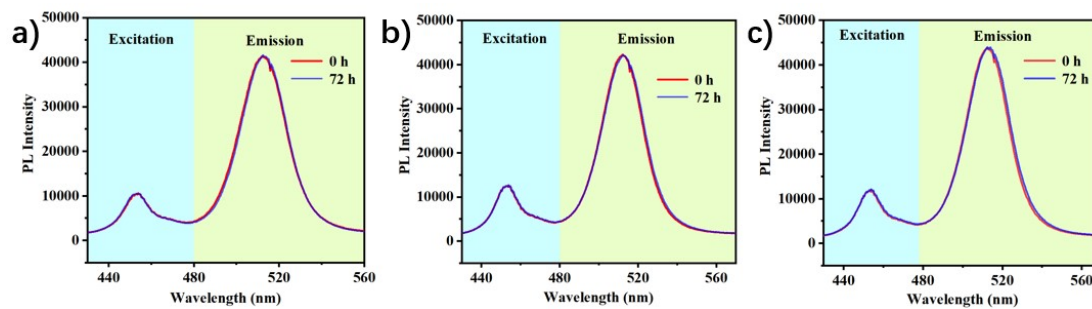

**Fig.S5** PL spectra of CsPbBr<sub>3</sub>-DPSI/MS composites in a) 1 mol/L KI, b) 1 mol/L KCl, and c) 1 mol/L HCl aqueous solutions for 0 and 72 h. 450 nm laser is used as the excitation light source.

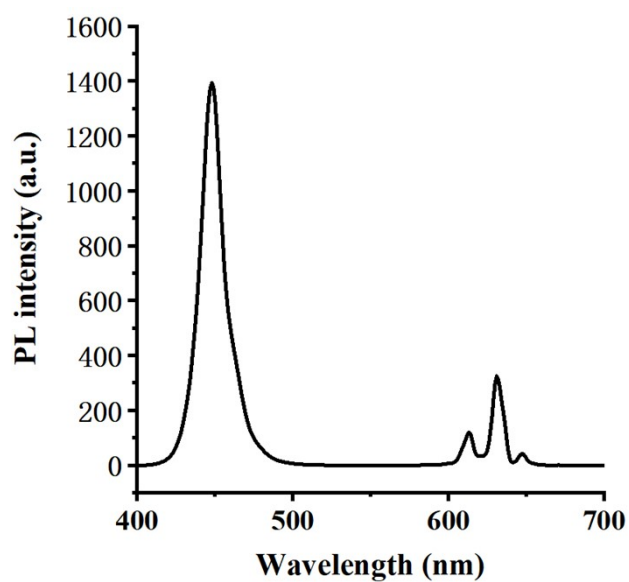

**Fig. S6** PL spectrum of purple LED chips in the LCD device

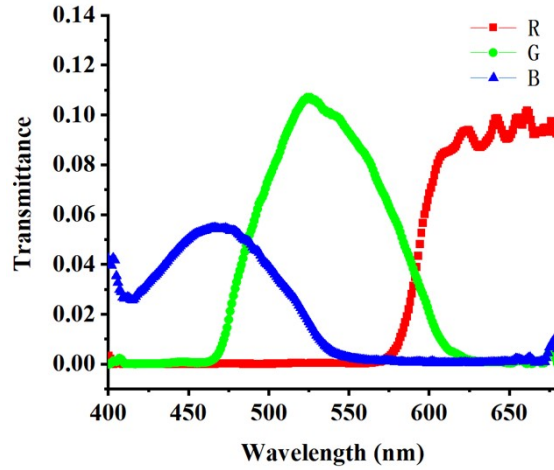

**Fig. S7** The transmittance spectrum of three primary colors in the LCD module

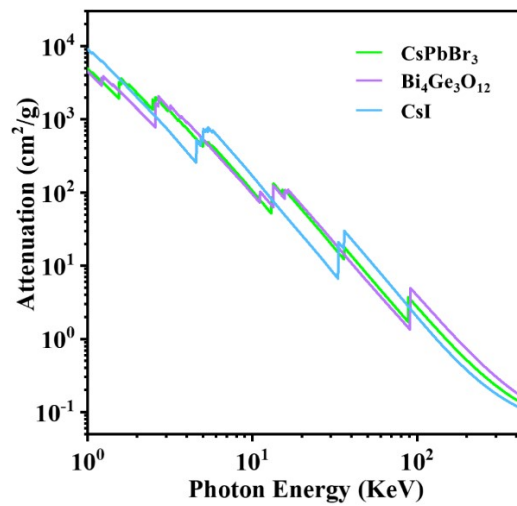

**Fig. S8** Calculated attenuation spectra of CsPbBr<sub>3</sub>, Bi<sub>4</sub>Ge<sub>3</sub>O<sub>12</sub>, and CsI as a function of X-ray photon energy.

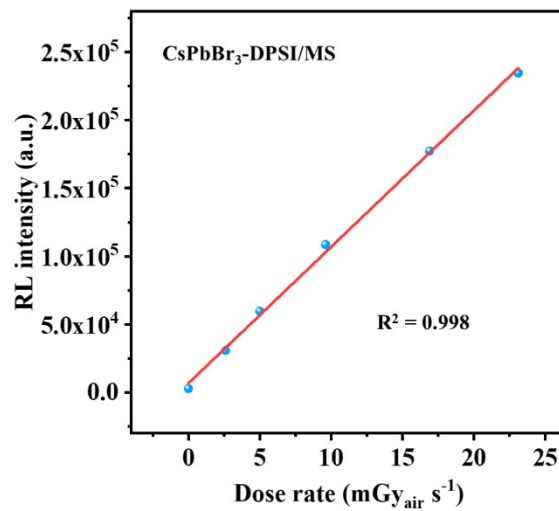

**Fig. S9** RL intensity for the CsPbBr<sub>3</sub>-DPSI/MS as a function of X-ray dose rate.

**Table S1** The parameters of carrier lifetime by fitting the TRPL spectroscopy based on CsPbBr<sub>3</sub>/MS and CsPbBr<sub>3</sub>-DPSI/MS composites.

The TRPL decay curves are fitted by a biexponential equation:

$$I(t) = I_0 + a_1 \exp(-t/\tau_1) + a_2 \exp(-t/\tau_2) \quad (\text{S1})$$

where  $a_1$  and  $a_2$  are amplitudes;  $\tau_1$  and  $\tau_2$  are lifetimes for fast and long PL decay processes.

$A_1$  and  $A_2$  are relative amplitudes, which can be calculated using the following formula:

$$A_i = \frac{a_i \tau_i}{\sum_{n=1}^2 a_n \tau_n} \quad (\text{S2})$$

$\tau_{\text{average}}$  is the average lifetime, which can be calculated using the following formula:

$$\tau_{\text{average}} = \tau_1 A_1 + \tau_2 A_2 \quad (\text{S3})$$

| Sample                       | $\tau_1$<br>[ns] | $A_1$<br>[%] | $\tau_2$<br>[ns] | $A_2$<br>[%] | $\tau_{\text{average}}$<br>[ns] |
|------------------------------|------------------|--------------|------------------|--------------|---------------------------------|
| CsPbBr <sub>3</sub> /MS      | 11.97            | 54.65        | 96.88            | 45.35        | 50.48                           |
| CsPbBr <sub>3</sub> .DPSI/MS | 8.32             | 78.91        | 43.59            | 21.09        | 15.76                           |

**Table S2** FWHM comparisons of typical fluorescence materials.

| materials                                                                               | FWHM [nm] | Ref.             |
|-----------------------------------------------------------------------------------------|-----------|------------------|
| CsPbBr <sub>3</sub> -Beta composites                                                    | 25        | 1                |
| CsPbBr <sub>3</sub> @glass nanocomposites                                               | 25.8      | 2                |
| CsPbBrI <sub>2</sub> glass                                                              | 31        | 3                |
| CsPb(Br/I) <sub>3</sub> NCs glass                                                       | 36        | 4                |
| CsPb(Br/I) <sub>3</sub> -PMMA film                                                      | 35        | 5                |
| CdSe/Zn <sub>x</sub> Cd <sub>1-x</sub> S/ZnS quantum rods                               | 25        | 6                |
| InP/ZnSe/ZnS QDs                                                                        | 36        | 7                |
| Cs <sub>3</sub> MnBr <sub>5</sub> polycrystalline                                       | 42        | 8                |
| Cs <sub>3</sub> MnBr <sub>5</sub> NCs                                                   | 43        | 9                |
| Cs <sub>3</sub> MnBr <sub>5</sub>                                                       | 42        | 10               |
| Cs <sub>3</sub> MnI <sub>5</sub> polycrystalline                                        | 48        | 11               |
| CsMn <sub>0.95</sub> Zn <sub>0.05</sub> Cl <sub>3</sub> NCs                             | 84        | 12               |
| Sr <sub>2</sub> LiAl <sub>0.6</sub> Ga <sub>0.4</sub> O <sub>4</sub> : Eu <sup>2+</sup> | 40        | 13               |
| NaBaB <sub>9</sub> O <sub>15</sub> : Eu <sup>2+</sup>                                   | 61        | 14               |
| β-Sialon: Eu <sup>2+</sup>                                                              | 55        | 15               |
| MgAl <sub>2</sub> O <sub>4</sub> : Mn <sup>2+</sup>                                     | 35        | 16               |
| <b>CsPbBr<sub>3</sub>-DPSI/MS composites</b>                                            | <b>25</b> | <b>this work</b> |

**Table S3** Stability and PLQY of the typical CsPbBr<sub>3</sub> QDs reported to date.

| materials                                                   | photostability                                                                                                                                                                                     | thermal stability                                                    | PLQY | Ref.      |
|-------------------------------------------------------------|----------------------------------------------------------------------------------------------------------------------------------------------------------------------------------------------------|----------------------------------------------------------------------|------|-----------|
| CsPbBr <sub>3</sub> :Sr/PbBr(OH)/molecular sieve composites | retained 80% PLQY after being aged under blue light irradiation (1500 W m <sup>-2</sup> ) for 200h                                                                                                 | retained 78% and 51% of their initial PL intensity at 60°C and 100°C | 75%  | 17        |
| CsPbBr <sub>3</sub> -HSZ ZSM-5 composites                   | /                                                                                                                                                                                                  | retained 43% and 7% of their initial PL intensity at 60°C and 100°C  | 62%  | 18        |
| CsPbBr <sub>3</sub> QDs@glass                               | retained 90% of their initial PL intensity after being irradiated with UV lamp (4 w) for 180 h                                                                                                     | retained 66% and 27% of their initial PL intensity at 60°C and 100°C | 47%  | 19        |
| CsPbBr <sub>3</sub> @MSNs-PDMS film                         | retained 98.4% of their initial PL intensity after being irradiated with blue light (500 W m <sup>-2</sup> ) for 12 h                                                                              | /                                                                    | 81%  | 20        |
| CsPbBr <sub>3</sub> /MS matrices                            | retained 100% of their initial PL intensities after being irradiated with 450 nm LED chip (20 mA, 2.7 V) for 1000 h                                                                                | /                                                                    | 71%  | 21        |
| BVA-CsPbBr <sub>3</sub> colloidal QDs                       | /                                                                                                                                                                                                  | retained 4% and 3% of their initial PL intensity at 60°C and 100°C   | 80%  | 22        |
| CsPbBr <sub>3</sub> -DPSI/MS Composites                     | retained 100% of their initial PL intensity after being exposed to blue light (3500W m <sup>-2</sup> ) for 48 h                                                                                    | retained 84% and 41% of their initial PL intensity at 60°C and 100°C | 93%  | this work |
|                                                             | retained 90% of their initial PL intensities under harsh aging conditions (temperature: 60°C, humidity: RH 90%, blue light irradiation with a power density of 3500 W m <sup>-2</sup> ) for 1000 h |                                                                      |      |           |



**Table S4** The three primary color coordinates of CPB-LCD and OC-LCD

|         |   | CIE x | CIE y |
|---------|---|-------|-------|
| CPB-LCD | R | 0.684 | 0.305 |
|         | G | 0.142 | 0.728 |
|         | B | 0.152 | 0.068 |
|         |   |       |       |
| OC-LCD  | R | 0.681 | 0.310 |
|         | G | 0.235 | 0.692 |
|         | B | 0.155 | 0.068 |

**Table S5** Spatial resolutions of X-ray imaging for the CsPbBr<sub>3</sub>-DPSI/MS composites-based scintillator and other typical perovskite scintillators.

| scintillators                                              | spatial resolution<br>[lp mm <sup>-1</sup> ] | Ref.             |
|------------------------------------------------------------|----------------------------------------------|------------------|
| CsPbBr <sub>3</sub> @PMMA<br>polymer film                  | 12.5                                         | 23               |
| CsPbBr <sub>3</sub> @Polymethyl<br>methacrylate composite  | 8                                            | 24               |
| CsPbBr <sub>3</sub> :Eu <sup>3+</sup> NCs<br>glass-ceramic | 15                                           | 25               |
| CsPbBr <sub>3</sub> NCs<br>+PPO scintillators              | 3.5                                          | 26               |
| Cs <sub>2</sub> AgBiBr <sub>6</sub>                        | 4.9                                          | 27               |
| Cs <sub>3</sub> Cu <sub>2</sub> I <sub>5</sub> @PMMA       | 12.5                                         | 28               |
| MAPbBr <sub>3</sub> QDs                                    | 9                                            | 29               |
| <b>CsPbBr<sub>3</sub>-DPSI/MS<br/>composites</b>           | <b>16</b>                                    | <b>this work</b> |

## Ref.

1. B. Li, Y. Zhang, Y. Xu and Z. Xia, *Journal of Materials Chemistry C*, 2021, 9, 12118-12123.
2. S. Chen, J. Lin, J. Huang, T. Pang, Q. Ye, Y. Zheng, X. Li, Y. Yu, B. Zhuang and D. Chen, *Advanced Functional Materials*, 2023, 34.
3. Q. Huang, W. Chen, X. Liang, C. Lv and W. Xiang, *ACS Sustainable Chemistry & Engineering*, 2023, 11, 9773-9781.
4. Q. Wang, M. Jin, Y. Chen, Y. Zhao, Y. Tong, Z. He, X. Liang and W. Xiang, *Adv. Opt. Mater.*, 2021, 9.
5. Z. Wang, Z. Wei, Y. Cai, L. Wang, M. Li, P. Liu, R. Xie, L. Wang, G. Wei and H. Y. Fu, *ACS Appl Mater Interfaces*, 2021, 13, 54143-54151.
6. C. Kang, M. F. Prodanov, Y. Gao, K. Mallem, Z. Yuan, V. V. Vashchenko and A. K. Srivastava, *Adv Mater*, 2021, 33, e2104685.
7. Y. Kim, S. Ham, H. Jang, J. H. Min, H. Chung, J. Lee, D. Kim and E. Jang, *ACS Appl. Nano Mater.*, 2019, 2, 1496-1504.
8. B. Su, M. S. Molokeev and Z. Xia, *Journal of Materials Chemistry C*, 2019, 7, 11220-11226.
9. Q. Kong, B. Yang, J. Chen, R. Zhang, S. Liu, D. Zheng, H. Zhang, Q. Liu, Y. Wang and K. Han, *Angew Chem Int Ed Engl*, 2021, 60, 19653-19659.
10. Y. Tao, H. Zhao, Y. Xu, D. Wang and Y. Wang, *Inorg Chem*, 2022, 61, 8782-8787.
11. Q. Kong, X. Meng, S. Ji, Q. Wang, B. Yang, T. Bai, X. Wang, Z. Wang, R. Zhang, D. Zheng, F. Liu and K.-l. Han, *ACS Materials Letters*, 2022, 4, 1734-1741.
12. X. Hao, H. Liu, W. Ding, F. Zhang, X. Li and S. Wang, *J Phys Chem Lett*, 2022, 13, 4688-4694.
13. J. Qiao, Y. Zhou, M. S. Molokeev, Q. Zhang and Z. Xia, *Laser & Photonics Reviews*, 2021, 15.
14. Y. Zhuo, S. Hariyani, J. Zhong and J. Brgoch, *Chemistry of Materials*, 2021, 33, 3304-3311.
15. S. Wang, X. Liu, B. Qu, Z. Song, Z. Wang, S. Zhang, F. Wang, W.-T. Geng and Q. Liu, *Journal of Materials Chemistry C*, 2019, 7, 12544-12551.
16. E. H. Song, Y. Y. Zhou, Y. Wei, X. X. Han, Z. R. Tao, R. L. Qiu, Z. G. Xia and Q. Y. Zhang, *Journal of Materials Chemistry C*, 2019, 7, 8192-8198.
17. T. Xuan, S. Guo, W. Bai, T. Zhou, L. Wang and R.-J. Xie, *Nano Energy*, 2022, 95, 107003.
18. Y. Zhang, L. Han, B. Li and Y. Xu, *Chem. Eng. J.*, 2022, 437, 135290.
19. Z. Yang, H. Zhang, Z. Fang, J. Yi, P. Song, X. Yu, D. Zhou, J. Qiu and X. Xu, *Chem. Eng. J.*, 2022, 427, 131379.
20. Q. Li, D. Shen, C. Luo, Z. Zheng, W. Xia, W. Ma, J. Li, Y. Yang, S. Chen and Y. Chen, *Small*, 2022, 18, 2107452.
21. Q. Zhang, B. Wang, W. Zheng, L. Kong, Q. Wan, C. Zhang, Z. Li, X. Cao, M. Liu and L. Li, *Nat. Commun.*, 2020, 11, 31.
22. S. Song, Y. Lv, B. Cao and W. Wang, *Adv. Funct. Mater.*, 2023, 33, 2300493.
23. W. Chen, M. Zhou, Y. Liu, X. Yu, C. Pi, Z. Yang, H. Zhang, Z. Liu, T. Wang, J. Qiu, S. F. Yu, Y. Yang and X. Xu, *Adv. Funct. Mater.*, 2021, 32, 2107424.
24. B. Wang, J. Peng, X. Yang, W. Cai, H. Xiao, S. Zhao, Q. Lin and Z. Zang, *Laser Photonics*

Rev., 2022, 16, 2100736.

25 W. Ma, T. Jiang, Z. Yang, H. Zhang, Y. Su, Z. Chen, X. Chen, Y. Ma, W. Zhu, X. Yu, H. Zhu, J. Qiu, X. Liu, X. Xu and Y. M. Yang, *Adv. Sci.*, 2021, 8, 2003728.

26 S. Cho, S. Kim, J. Kim, Y. Jo, I. Ryu, S. Hong, J. J. Lee, S. Cha, E. B. Nam, S. U. Lee, S. K. Noh, H. Kim, J. Kwak and H. Im, *Light Sci. Appl.*, 2020, 9, 156.

27 B. Yang, W. Pan, H. Wu, G. Niu, J. H. Yuan, K. H. Xue, L. Yin, X. Du, X. S. Miao, X. Yang, Q. Xie and J. Tang, *Nat. Commun.*, 2019, 10, 1989.

28 W. Zhou, X. Zhu, J. Yu, D. Mou, H. Li, L. Kong, T. Lang, L. Peng, W. Chen, X. Xu and B. Liu, *ACS Appl. Mater. Interfaces*, 2023, 15, 38741-38749.

29 Q. Xu, S. Zhou, J. Huang, X. Ouyang, J. Liu, Y. Guo, J. Wang, J. Nie, X. Zhang, X. Ouyang and W. Jia, *Mater. Today Phys.*, 2021, 18, 100390.
